# Supplementary material
Source: MDPI journal article supplement (https://www.mdpi.com/2227-9717/11/1/170)
Supplement: s1 [file s1]

# TLC-Densitometric Analysis of Selected 5-Nitroimidazoles

Alina Pyka-Pająk

Department of Analytical Chemistry, Faculty of Pharmaceutical Sciences in Sosnowiec,  
Medical University of Silesia in Katowice, Jagiellońska 4, 41-200 Sosnowiec, Poland  
Correspondence: apyka@sum.edu.pl (A.P.-P.); Tel.: +48-32-364-15-30

**Table S1.** Full description the chromatographic peaks of examined metronidazole, secnidazole, ornidazole, and tinidazole and their degradation products formed during pharmaceutical active ingredient heating on silica gel at 120°C for 24 h.

| Compound <sup>1)</sup> | R <sub>F</sub><br>Value | Band area [%] | Maximal Absorption<br>Wavelength [nm] |
|------------------------|-------------------------|---------------|---------------------------------------|
| M                      | 0.36                    | 87.54         | 308                                   |
| PM1                    | 0.04                    | 7.03          | 400                                   |
| PM2                    | 0.29                    | 5.43          | 200                                   |
| S                      | 0.41                    | 89.02         | 309                                   |
| PS1                    | 0.03                    | 4.22          | 400                                   |
| PS2                    | 0.50                    | 6.76          | 400                                   |
| O                      | 0.44                    | 26.49         | 310                                   |
| PO1                    | 0.04                    | 8.33          | 400                                   |
| PO2                    | 0.19                    | 40.25         | 400                                   |
| PO3                    | 0.30                    | 9.68          | 400                                   |
| PO4                    | 0.48                    | 15.25         | 200                                   |
| T                      | 0.55                    | 43.19         | 309                                   |
| PT1                    | 0.36                    | 56.81         | 282                                   |

<sup>a)</sup> M – metronidazole, PM1, PM2 – degradation products of metronidazole;; S – secnidazole, PS1, PS2 - degradation products of secnidazole; T-tinidazole, PT1- degradation product of tinidazole identified as 2-methyl-5-nitroimidazole; O-ornidazole, PO1, PO2, PO3, PO4 – degradation products of ornidazole

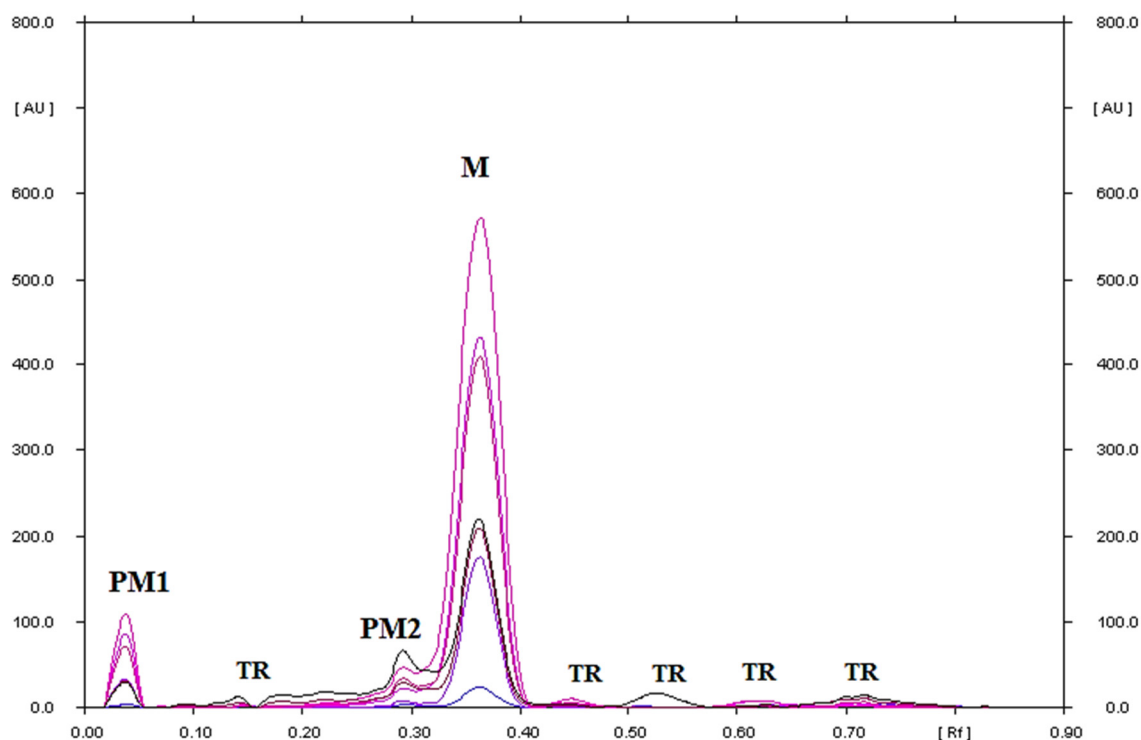

**Figure S1.** TLC-UV densitograms recorded in the multi wavelength from 200 to 380 nm (at wavelength intervals of 30 nm at each step) of metronidazole heated on silica gel at 120°C for 24 h which was next separating using chloroform-methanol (9:1, v/v) as mobile phase; where: M-metronidazole, PM1, PM2 – degradation products of metronidazole, TR – traces.

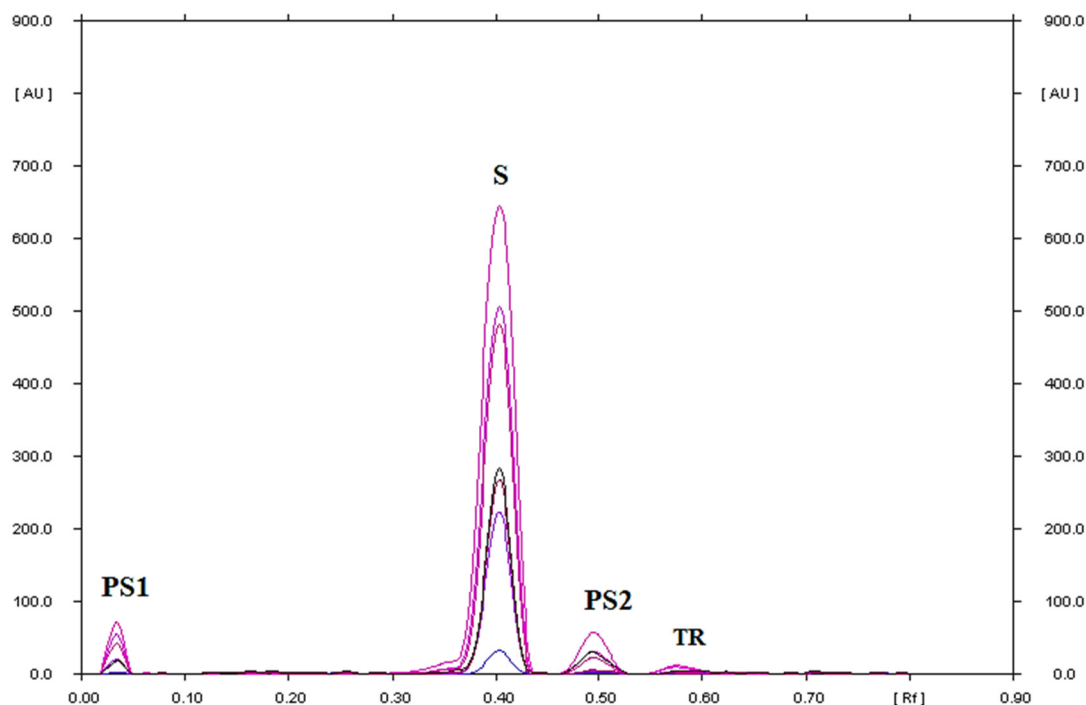

**Figure S2.** TLC-UV densitograms recorded in the multi wavelength from 200 to 380 nm (at wavelength intervals of 30 nm at each step) of secnidazole heated on silica gel at 120°C for 24 h which was next separating using chloroform-methanol (9:1, v/v) as mobile phase; where: S-secnidazole, PS1, PS2 – degradation products of secnidazole, TR – trace.

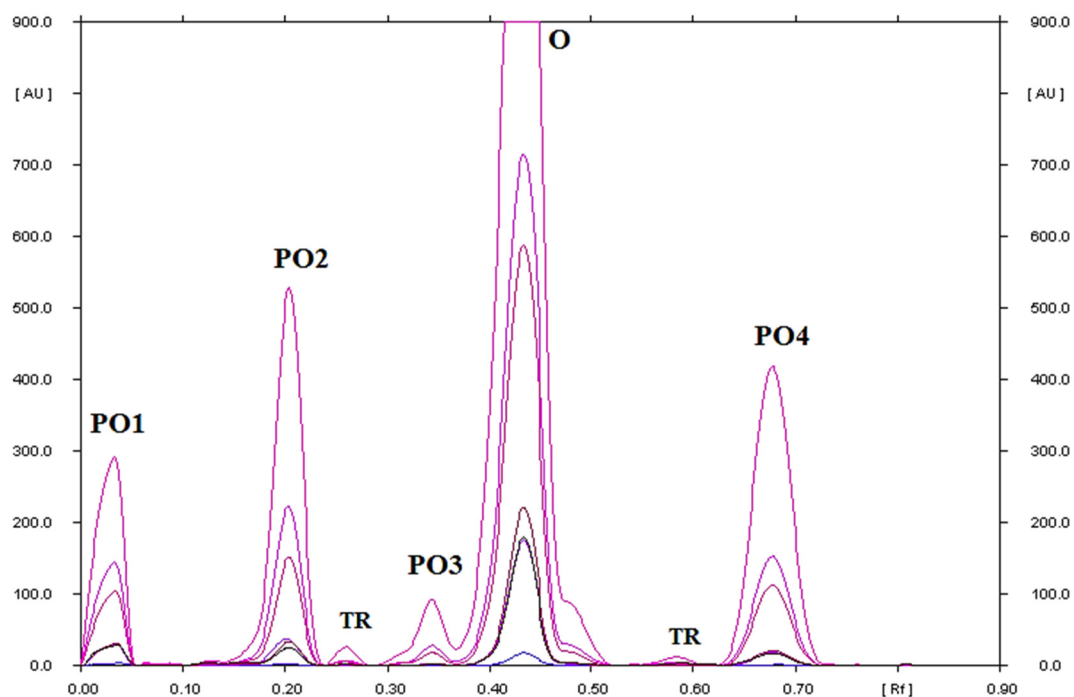

**Figure S3.** TLC-UV densitograms recorded in the multi wavelength from 200 to 380 nm (at wavelength intervals of 30 nm at each step) of ornidazole heated on silica gel at 80°C for 24 h which was next separating using chloroform-methanol (9:1, v/v) as mobile phase; where: O-ornidazole, PO1, PO2, PO3, PO4 – degradation products of ornidazole, TR – traces.

**Table S2.** Full description the chromatographic peaks of examined metronidazole and its degradation products formed during metronidazole heating in solutions at 40°C for 1000 h.

| Metronidazole solution <sup>1)</sup> | Compound <sup>2)</sup> | R <sub>F</sub> Value | Band area [%] | Maximal Absorption |
|--------------------------------------|------------------------|----------------------|---------------|--------------------|
|                                      |                        |                      |               | Wavelength [nm]    |
| I                                    | M                      | 0.39                 | 100.00        | 312                |
| II                                   | M                      | 0.36                 | 100.00        | 312                |
| III                                  | M                      | 0.36                 | 100.00        | 312                |
| IV                                   | PM1                    | 0.05                 | 2.17          | 200                |
|                                      | PM2                    | 0.23                 | 3.42          | 323                |
|                                      | PM3                    | 0.27                 | 3.10          | 308                |
|                                      | PM4                    | 0.31                 | 3.02          | 200                |
|                                      | PM5                    | 0.45                 | 14.39         | 304                |
|                                      | M                      | 0.36                 | 73.90         | 312                |
| V                                    | M                      | 0.36                 | 100.00        | 313                |
| VI                                   | M                      | 0.37                 | 100.00        | 312                |
| VII                                  | M                      | 0.36                 | 100.00        | 313                |

where: <sup>1)</sup>Metronidazole solution: I – in water at pH=2.62; II – in water at pH=5.56; III- in water at pH=8.21; IV- in hydrogen peroxide (3%); V – in physiological salt (0.9% NaCl); VI- in methanol, VII – standard solution; <sup>2)</sup>M-metronidazole, PM1, PM2, PM3, PM4, PM5-degradation products of metronidazole

**Table S3.** Full description the chromatographic peaks of examined secnidazole and its degradation products formed during secnidazole heating in solutions at 40°C for 1000 h.

| Secnidazole solution <sup>1)</sup> | Compound <sup>2)</sup> | R <sub>F</sub> Value | Band area [%] | Maximal Absorption |
|------------------------------------|------------------------|----------------------|---------------|--------------------|
|                                    |                        |                      |               | Wavelength [nm]    |
| I                                  | S                      | 0.49                 | 96.26         | 312                |
|                                    | PS1                    | 0.70                 | 3.74          | 200                |
| II                                 | S                      | 0.45                 | 100           | 313                |
| III                                | S                      | 0.46                 | 100           | 312                |
| IV                                 | S                      | 0.49                 | 73.25         | 313                |
|                                    | PS1                    | 0.03                 | 3.98          | 200                |
|                                    | PS2                    | 0.37                 | 3.57          | 308                |
|                                    | PS3                    | 0.43                 | 1.84          | 200                |
|                                    | PS4                    | 0.56                 | 17.36         | 304                |
| V                                  | S                      | 0.45                 | 100           | 312                |
| VI                                 | S                      | 0.48                 | 100           | 313                |
| VII                                | S                      | 0.47                 | 100           | 304                |

Where: <sup>1)</sup>Secnidazole solution: I – in water at pH=2.62; II – in water at pH=5.56; III- in water at pH=8.21; IV- in hydrogen peroxide (3%); V – in physiological salt (0.9% NaCl); VI- in methanol, VII – standard solution; <sup>2)</sup>S-metronidazole, PS1, PS2, PS3, PS4-degradation products of secnidazole; PS2 was identified as 2-methyl-5-nitroimidazole

**Table S4.** Full description the chromatographic peaks of examined ornidazole and its degradation products formed during ornidazole heating in solutions at 40°C for 1000 h.

| Ornidazole solution <sup>1)</sup> | Compound <sup>2)</sup> | R <sub>F</sub> Value | Band area [%] | Maximal Absorption Wavelength [nm] |
|-----------------------------------|------------------------|----------------------|---------------|------------------------------------|
| I                                 | O                      | 0.51                 | 94.87         | 312                                |
|                                   | PO1                    | 0.68                 | 5.13          | 200                                |
| II                                | O                      | 0.49                 | 77.00         | 312                                |
|                                   | PO1                    | 0.25                 | 17.95         | 312                                |
|                                   | PO2                    | 0.63                 | 2.65          | 200                                |
|                                   | PO3                    | 0.69                 | 2.40          | 200                                |
| III                               | O                      | 0.49                 | 80.07         | 313                                |
|                                   | PO1                    | 0.27                 | 17.08         | 312                                |
|                                   | PO2                    | 0.61                 | 2.85          | 200                                |
| IV                                | O                      | 0.47                 | 88.40         | 312                                |
|                                   | PO1                    | 0.32                 | 3.71          | 320                                |
|                                   | PO2                    | 0.35                 | 4.32          | 305                                |
|                                   | PO3                    | 0.61                 | 11.77         | 200                                |
| V                                 | O                      | 0.47                 | 83.76         | 312                                |
|                                   | PO1                    | 0.23                 | 11.77         | 315                                |
|                                   | PO2                    | 0.60                 | 2.48          | 200                                |
|                                   | PO3                    | 0.67                 | 1.99          | 312                                |
| VI                                | O                      | 0.47                 | 88.29         | 312                                |
|                                   | PO1                    | 0.60                 | 2.23          | 324                                |
|                                   | PO2                    | 0.67                 | 9.48          | 312                                |
| VII                               | O                      | 0.47                 | 100.00        | 313                                |

where: <sup>1)</sup>ornidazole solution: I – in water at pH=2.62; II – in water at pH=5.56; III- in water at pH=8.21; IV- in hydrogen peroxide (3%); V – in physiological salt (0.9% NaCl); VI- in methanol, VII – standard solution; <sup>2)</sup> O-ornidazole, PO1, PO2, PO3-degradation products of ornidazole

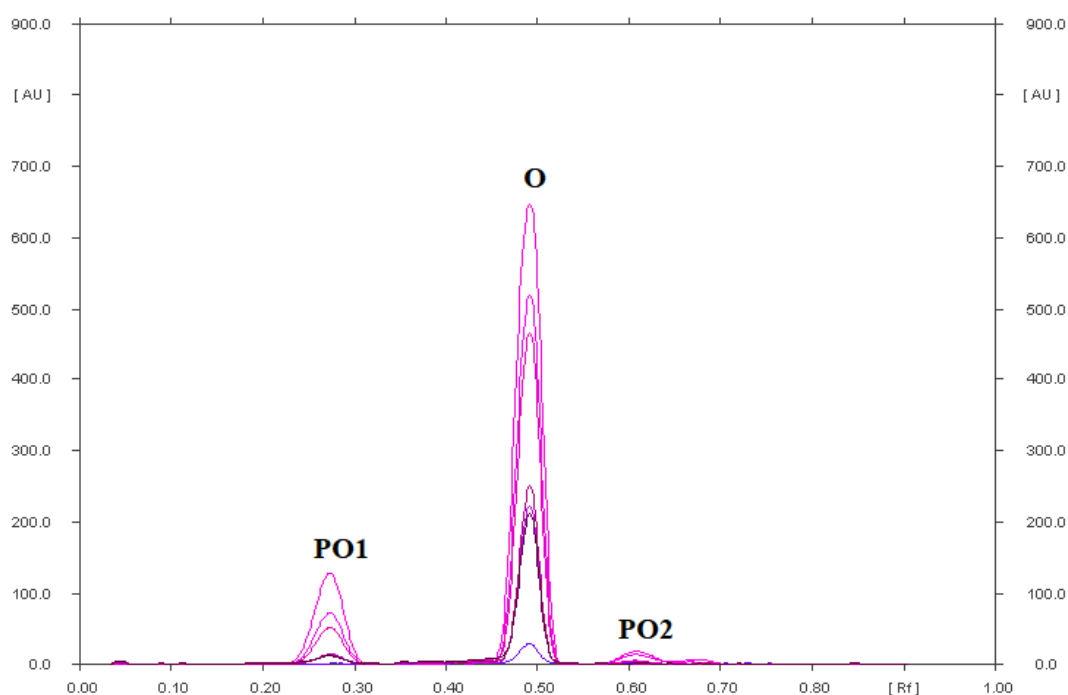

**Figure S4.** TLC-UV densitograms recorded in the multi wavelength from 200 to 380 nm (at wavelength intervals of 30 nm at each step) of ornidazole in water at pH=8.21 solution, which after heating at 40°C for 1000 h was separated on silica gel using a mobile phase chloroform–methanol (9:1, v/v/); where: O-ornidazole, PO1, PO2 - degradation products of ornidazole.

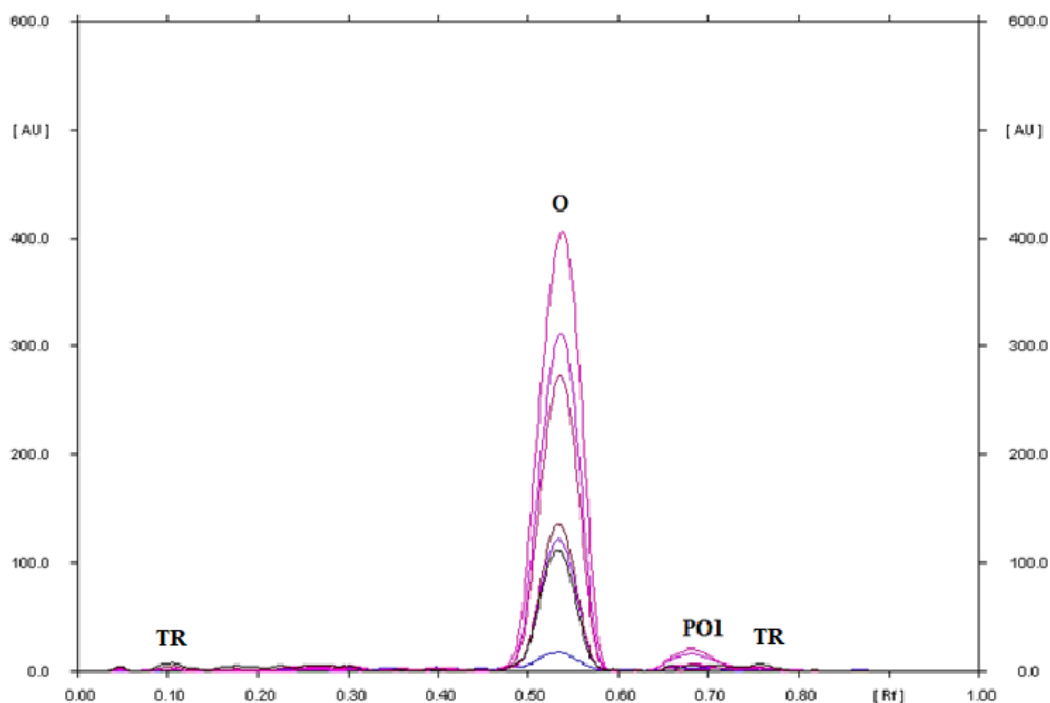

**Figure S5.** TLC-UV densitograms recorded in the multi wavelength from 200 to 380 nm (at wavelength intervals of 30 nm at each step) of ornidazole in water at pH=2.62 solution, which after heating at 40°C for 1000 h was separated on silica gel using a mobile phase chloroform–methanol (9:1, v/v/); where: O-ornidazole, PO1 - degradation product of ornidazole, TR – traces.

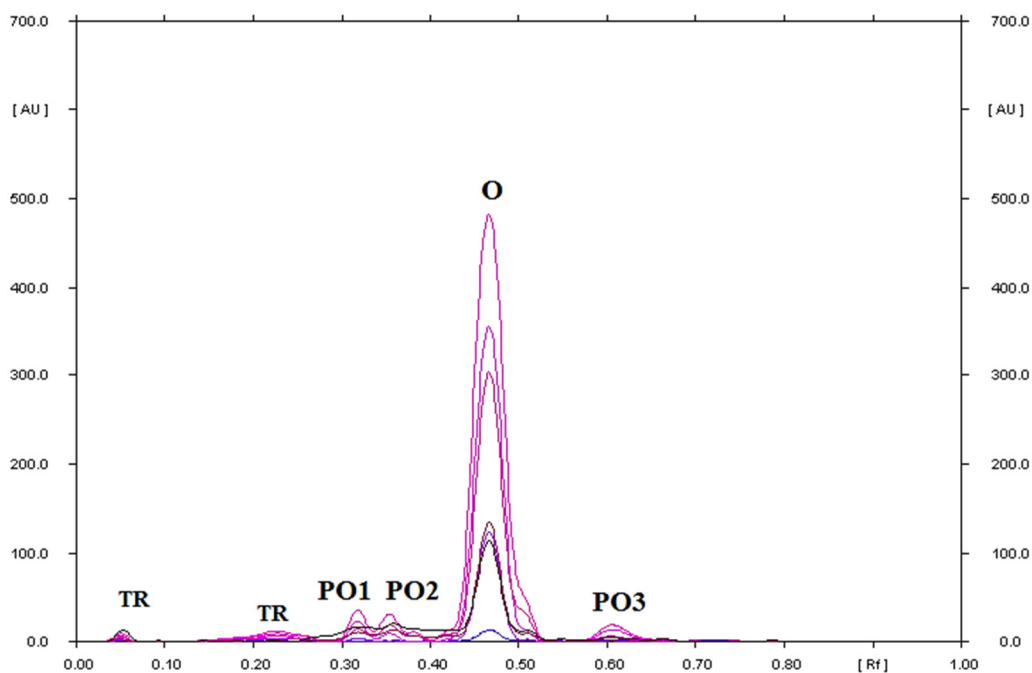

**Figure S6.** TLC-UV densitograms recorded in the multi wavelength from 200 to 380 nm (at wavelength intervals of 30 nm at each step) of ornidazole in hydrogen peroxide (3%) solution, which after heating at 40°C for 1000 h was separated on silica gel using a mobile phase chloroform–methanol (9:1, v/v/); where: O-ornidazole, PO1, PO2, PO3-degradation products of ornidazole, TR – traces.

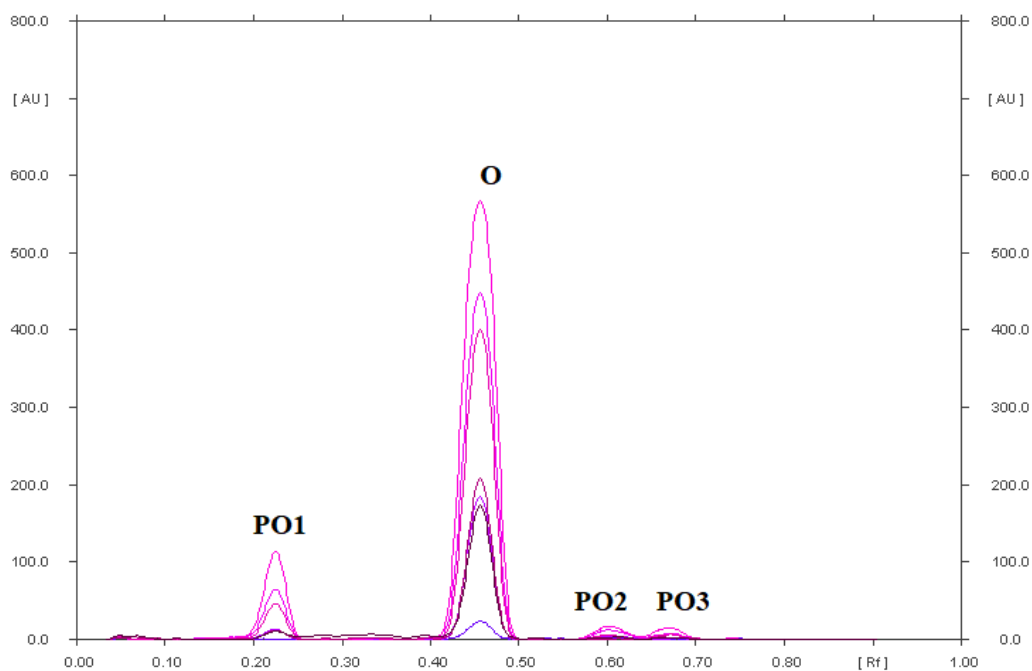

**Figure S7.** TLC-UV densitograms recorded in the multi wavelength from 200 to 380 nm (at wavelength intervals of 30 nm at each step) of ornidazole in physiological salt (0.9% NaCl) solution, which after heating at 40°C for 1000 h was separated on silica gel using a mobile phase chloroform–methanol (9:1, v/v/); where: O-ornidazole, PO1, PO2, PO3-degradation products of ornidazole.

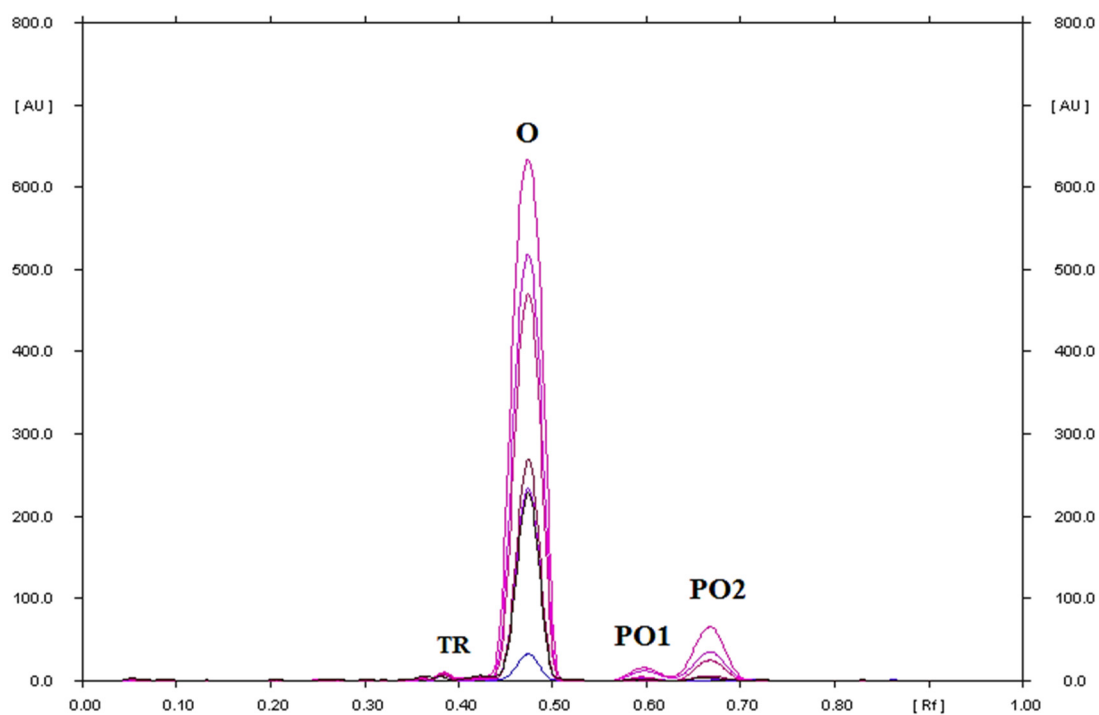

**Figure S8.** TLC-UV densitograms recorded in the multi wavelength from 200 to 380 nm (at wavelength intervals of 30 nm at each step) of ornidazole in methanolic solution, which after heating at 40°C for 1000 h was separated on silica gel using a mobile phase chloroform–methanol (9:1, v/v/); where: O-ornidazole, PO1, PO2 -degradation products of ornidazole, TR – trace.



**Table S5.** Full description the chromatographic peaks of examined tinidazole and its degradation products formed during tinidazole heating in solutions at 40°C for 1000 h.

| Tinidazole solution <sup>1)</sup> | Compound <sup>2)</sup> | R <sub>F</sub> Value | Band area [%] | Maximal Absorption |
|-----------------------------------|------------------------|----------------------|---------------|--------------------|
|                                   |                        |                      |               | Wavelength [nm]    |
| I                                 | T                      | 0.57                 | 100.00        | 312                |
|                                   | T                      | 0.53                 | 56.73         | 311                |
| II                                | P1                     | 0.22                 | 1.38          | 200                |
|                                   | P2                     | 0.31                 | 0.32          | 200                |
|                                   | P3                     | 0.34                 | 36.76         | 308                |
|                                   | P4                     | 0.41                 | 4.81          | 200                |
| III                               | T                      | 0.53                 | 64.47         | 311                |
|                                   | P1                     | 0.36                 | 35.53         | 307                |
| IV                                | T                      | 0.55                 | 77.59         | 311                |
|                                   | P1                     | 0.40                 | 3.85          | 315                |
|                                   | P2                     | 0.44                 | 5.55          | 307                |
|                                   | P3                     | 0.51                 | 13.01         | 299                |
| V                                 | T                      | 0.53                 | 61.22         | 311                |
|                                   | P1                     | 0.35                 | 38.78         | 307                |
| VI                                | T                      | 0.54                 | 70.73         | 312                |
|                                   | P1                     | 0.38                 | 29.27         | 308                |
| VII                               | T                      | 0.55                 | 100.00        | 311                |

Where: <sup>1)</sup>Tinidazole solution: I – in water at pH=2.62; II – in water at pH=5.56; III- in water at pH=8.21; IV- in hydrogen peroxide (3%); V – in physiological salt (0.9% NaCl); VI- in methanol, VII – standard solution; <sup>2)</sup> O-ornidazole, PT1, PT2, PT3, PT4-degradation products of tinidazole; degradation product with R<sub>F</sub> equal about 0.34-0.38 was identified as 2-methyl-5-nitroimidazole

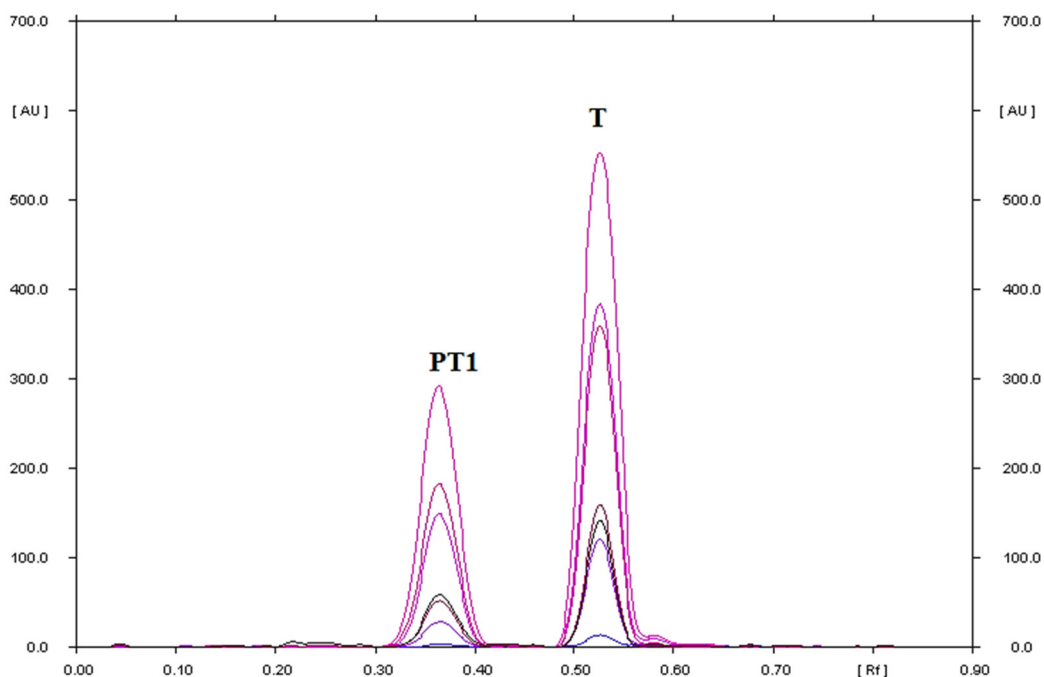

**Figure S9.** TLC-UV densitograms recorded in the multi wavelength from 200 to 380 nm (at wavelength intervals of 30 nm at each step) of tinidazole in water at pH=8.21 solution, which after heating at 40°C for 1000 h was separated on silica gel using a mobile phase chloroform–methanol (9:1, v/v/); where: T-tinidazole, PT1 - degradation product of tinidazole identified as 2-methyl-5-nitroimidazole.

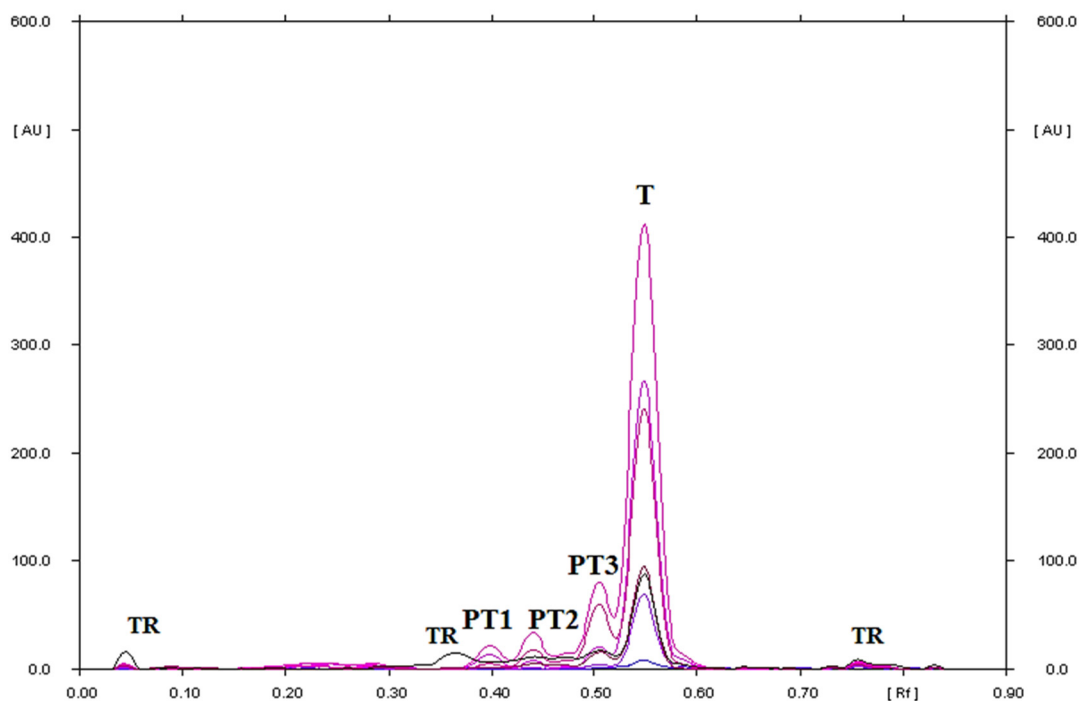

**Figure S10.** TLC-UV densitograms recorded in the multi wavelength from 200 to 380 nm (at wavelength intervals of 30 nm at each step) of tinidazole in hydrogen peroxide (3%) solution, which after heating at 40°C for 1000 h was separated on silica gel using a mobile phase chloroform–methanol (9:1, v/v/); where: T-tinidazole, PT1, PT2, PT3 - degradation products of tinidazole, TR – traces.

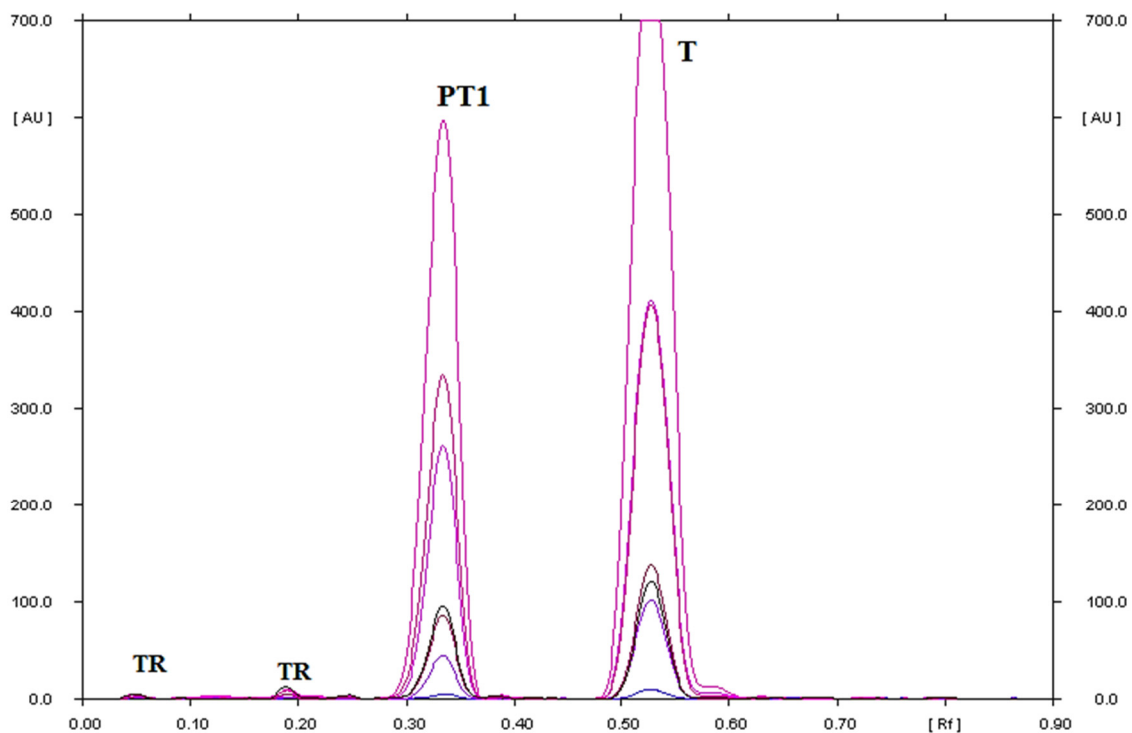

**Figure S11.** TLC-UV densitograms recorded in the multi wavelength from 200 to 380 nm (at wavelength intervals of 30 nm at each step) of tinidazole in physiological salt (0.9% NaCl) solution, which after heating at 40°C for 1000 h was separated on silica gel using a mobile phase chloroform–methanol (9:1, v/v/); where: T-tinidazole, PT1 - degradation product of tinidazole identified as 2-methyl-5-nitroimidazole, TR – traces.

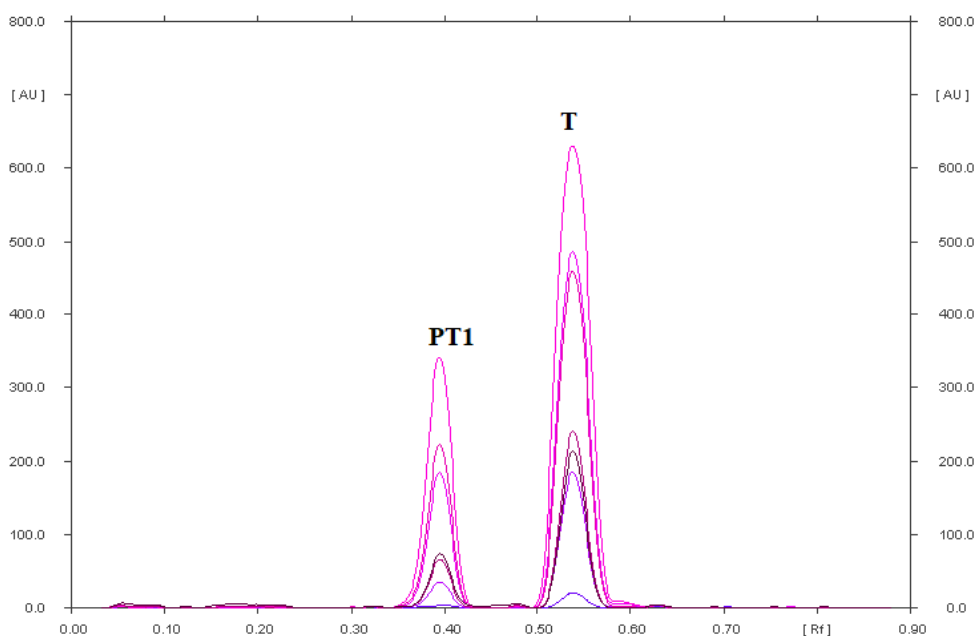

**Figure S12.** TLC-UV densitograms recorded in the multi wavelength from 200 to 380 nm (at wavelength intervals of 30 nm at each step) of tinidazole in methanolic solution, which after heating at 40°C for 1000 h was separated on silica gel using a mobile phase chloroform–methanol (9:1, v/v/); where: T-tinidazole, PT1 - degradation product of tinidazole identified as 2-methyl-5-nitroimidazole.

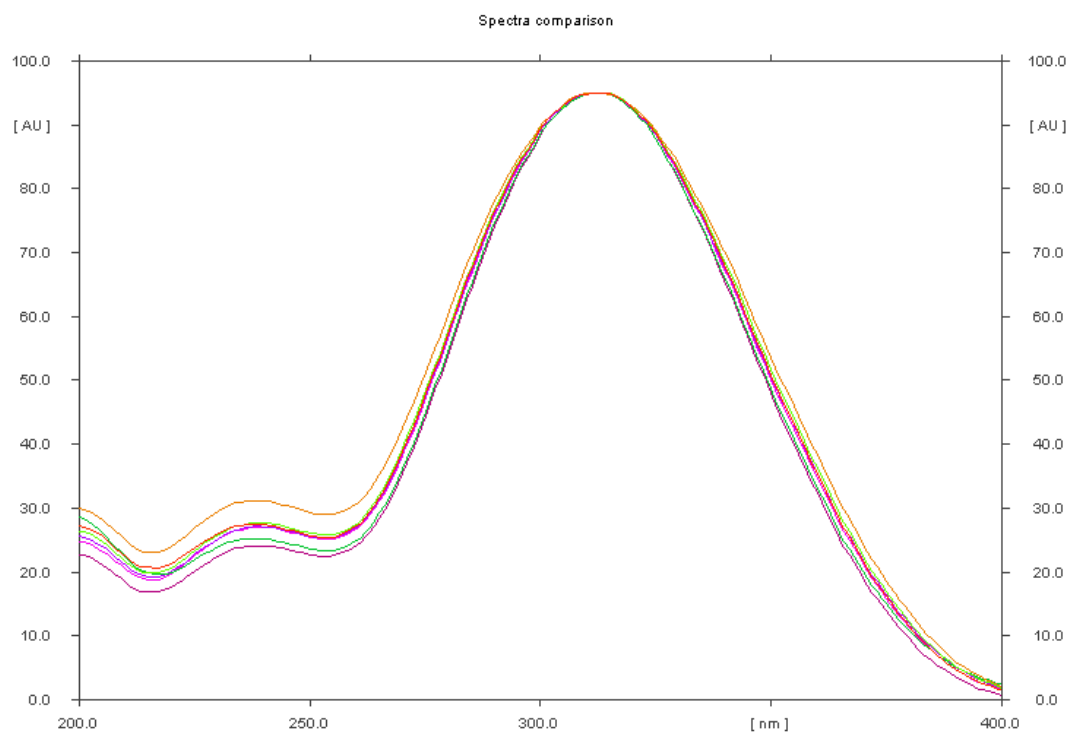

**Figure S13.** Spectra comparison of standard metronidazole and metronidazole after heating in different solutions.

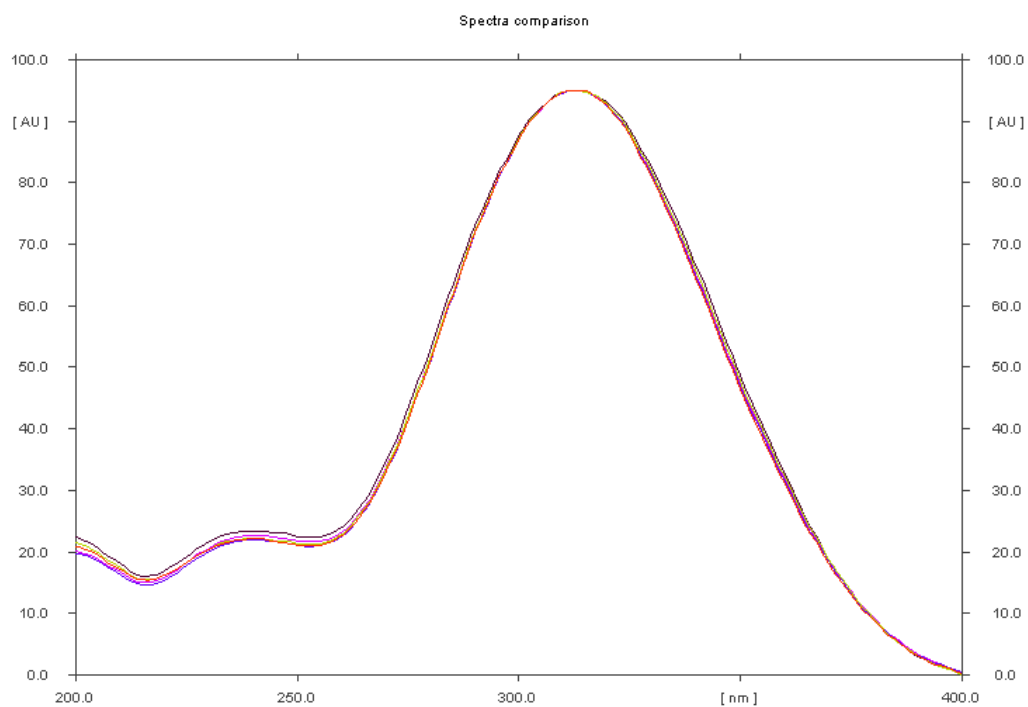

**Figure S14.** Spectra comparison of standard secnidazole and secnidazole after heating in different solutions.

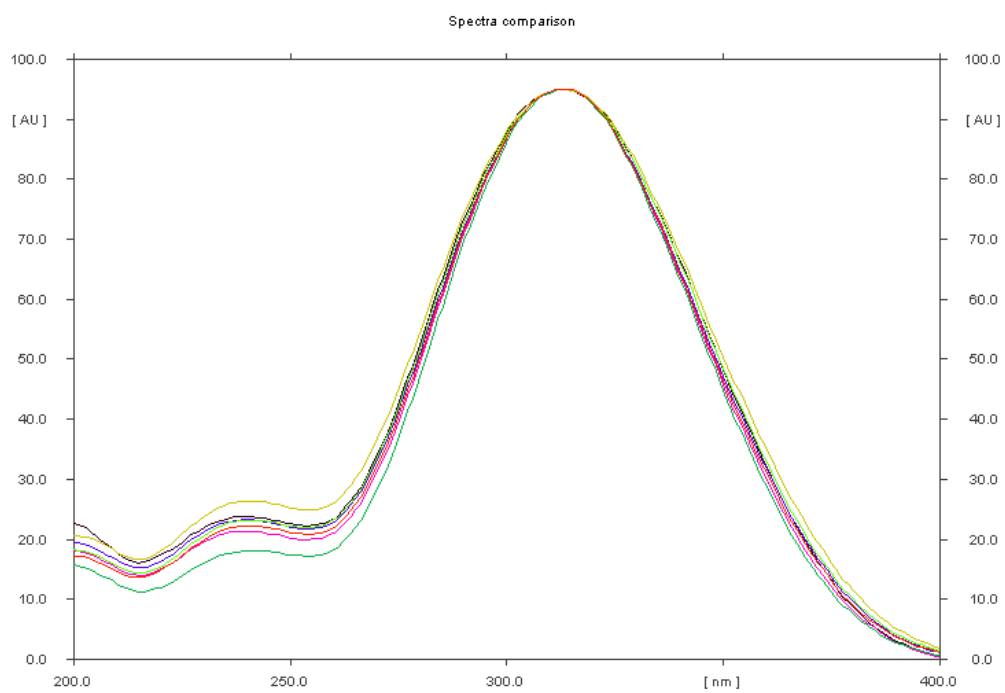

**Figure S15.** Spectra comparison of standard ornidazole and ornidazole after heating in different solutions.

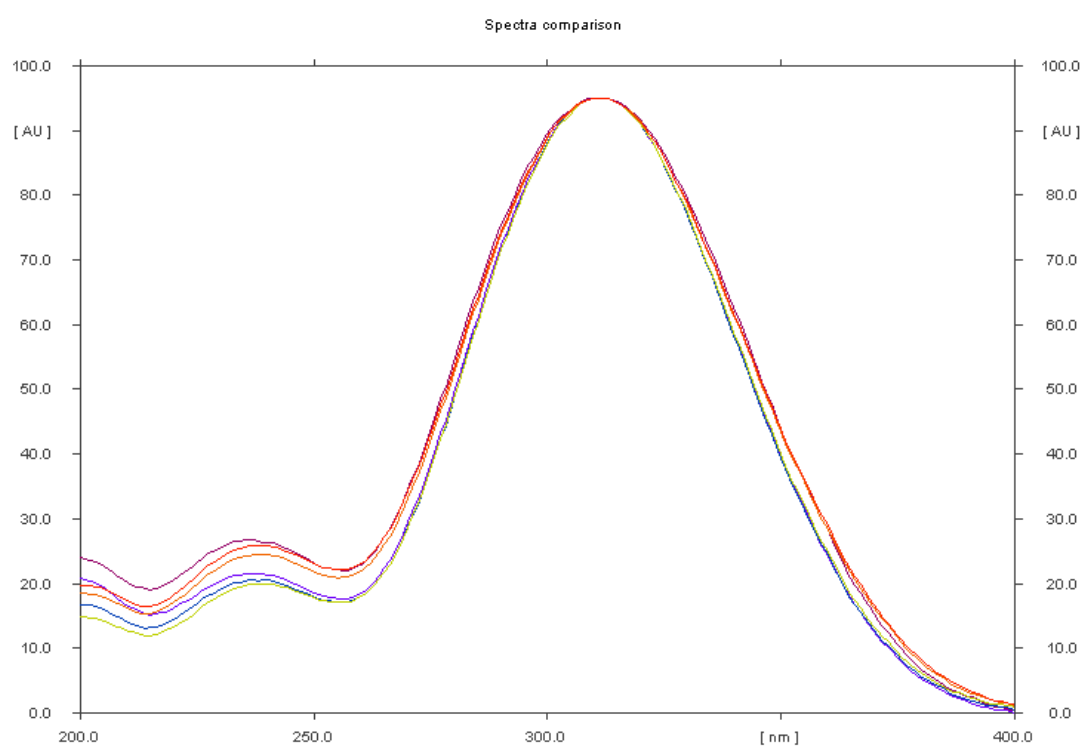

**Figure S16.** Spectra comparison of standard tinidazole and tinidazole after heating in different solutions.
